# Supplementary material for: A Clinician's Guide to Healthy Eating for Cardiovascular Disease Prevention
Source: PubMed Central journal article supplement — Mayo Clin Proc Innov Qual Outcomes. 2019 Aug 1;3(3):251–67. doi: 10.1016/j.mayocpiqo.2019.05.001 (PMC6713921; doi:10.1016/j.mayocpiqo.2019.05.001), 2019-08-01
Supplement: mmc1.pdf [file mmc1.pdf]

Example of a nutrition counseling tool to be filled prior to clinic visits that may help facilitate personalized nutrition counseling discussion.

|                                                                                                                                                                                                                                                                                           |           |            |            |           |                         |
|-------------------------------------------------------------------------------------------------------------------------------------------------------------------------------------------------------------------------------------------------------------------------------------------|-----------|------------|------------|-----------|-------------------------|
| <b>Height:</b> _____ in <b>Weight:</b> _____ lbs <b>BMI:</b> _____ <b>Usual Body Weight (UBW) :</b> _____                                                                                                                                                                                 |           |            |            |           |                         |
| <b>Change in weight:</b> <input type="checkbox"/> stable <input type="checkbox"/> increased <input type="checkbox"/> decreased                                                                                                                                                            |           |            |            |           |                         |
| <b>Goal weight:</b> _____ lbs                                                                                                                                                                                                                                                             |           |            |            |           |                         |
| <b>Risk Factors:</b> <input type="checkbox"/> DM type 1 <input type="checkbox"/> DM type 2 <input type="checkbox"/> high chol <input type="checkbox"/> low HDL <input type="checkbox"/> high trig <input type="checkbox"/> HTN <input type="checkbox"/>                                   |           |            |            |           |                         |
| <b>Labs</b>                                                                                                                                                                                                                                                                               | <b>TC</b> | <b>LDL</b> | <b>HDL</b> | <b>TG</b> | <b>HbA<sub>1c</sub></b> |
| XX / XX /XX<br>XX / XX /XX<br>XX / XX /XX<br>XX / XX /XX                                                                                                                                                                                                                                  |           |            |            |           |                         |
| <b>Supplements:</b>                                                                                                                                                                                                                                                                       |           |            |            |           |                         |
| <b>Food Allergies:</b>                                                                                                                                                                                                                                                                    |           |            |            |           |                         |
| <b>Exercise/Activity:</b>                                                                                                                                                                                                                                                                 |           |            |            |           |                         |
| <input type="checkbox"/> Currently Exercising on Regular basis: _____<br><input type="checkbox"/> No formal exercise at this time<br><input type="checkbox"/> Do you take stairs rather than elevators or escalators<br><input type="checkbox"/> Future Plans to include regular exercise |           |            |            |           |                         |
| <b>ASSESSMENT: Could be either recall or 3 day food record filled prior to visit (mailed)</b>                                                                                                                                                                                             |           |            |            |           |                         |
| <b>Diet Recall</b>                                                                                                                                                                                                                                                                        |           |            |            |           |                         |
| Breakfast: _____                                                                                                                                                                                                                                                                          |           |            |            |           |                         |
| Snack: _____                                                                                                                                                                                                                                                                              |           |            |            |           |                         |
| Lunch: _____                                                                                                                                                                                                                                                                              |           |            |            |           |                         |
| Snack: _____                                                                                                                                                                                                                                                                              |           |            |            |           |                         |
| Dinner: _____                                                                                                                                                                                                                                                                             |           |            |            |           |                         |
| Snack: _____                                                                                                                                                                                                                                                                              |           |            |            |           |                         |
| <b>Beverages:</b> <input type="checkbox"/> soda _____, <input type="checkbox"/> water _____, <input type="checkbox"/> alcohol _____                                                                                                                                                       |           |            |            |           |                         |
| <b># times/week:</b> <input type="checkbox"/> fish _____, <input type="checkbox"/> red meats _____                                                                                                                                                                                        |           |            |            |           |                         |
| <b>Restaurant frequency:</b> _____                                                                                                                                                                                                                                                        |           |            |            |           |                         |
| <b>Diet History</b>                                                                                                                                                                                                                                                                       |           |            |            |           |                         |
| <input type="checkbox"/> Do you eat because you're hungry...or rather because it is "meal time" (and not hungry)                                                                                                                                                                          |           |            |            |           |                         |
| <input type="checkbox"/> Skips meals _____                                                                                                                                                                                                                                                |           |            |            |           |                         |
| <input type="checkbox"/> Excessive calorie intake, snacking                                                                                                                                                                                                                               |           |            |            |           |                         |
| <input type="checkbox"/> High calorie beverages _____                                                                                                                                                                                                                                     |           |            |            |           |                         |
| <input type="checkbox"/> High intake of: refined carbohydrates, sodium, fat(saturated, trans fat)                                                                                                                                                                                         |           |            |            |           |                         |
| <input type="checkbox"/> Inadequate intake of: fruits, vegetables, whole grains, fiber, fluids, calcium rich foods                                                                                                                                                                        |           |            |            |           |                         |
